# Supplementary material for: Surface-modified CAU-10 MOF materials as humidity sensors: impedance spectroscopic study on water uptake
Source: Royal Society of Chemistry journal article supplement (doi:10.1039/c5cp01988e), 2015-01-01
Supplement: c5cp01988e1.pdf [file c5cp01988e1.pdf]

## Supporting Information

### Additional Data

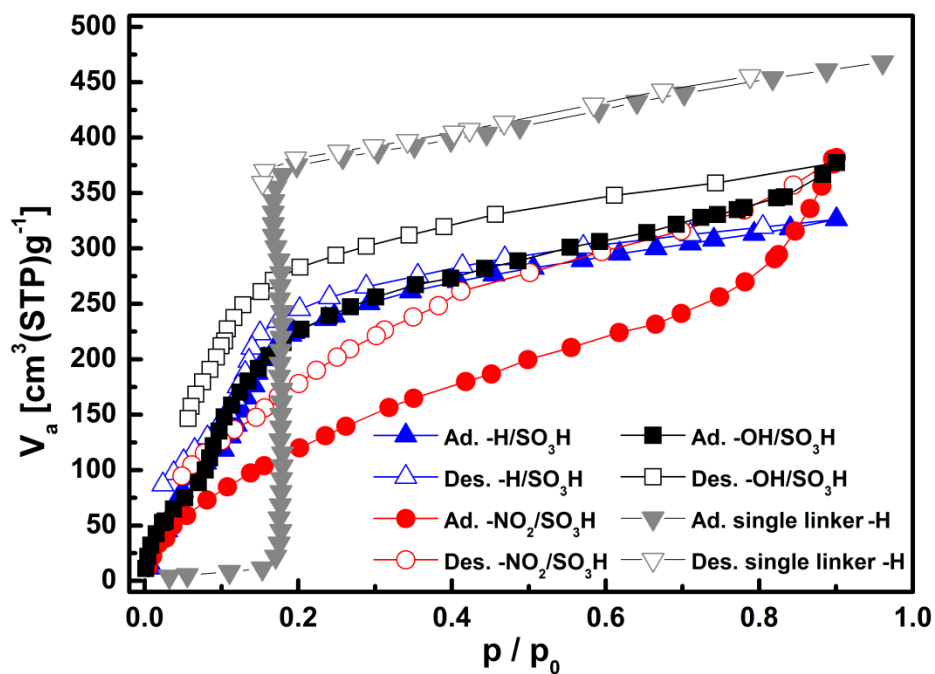

**Figure S1.** Water sorption isotherms at 298 K of the samples H-MOF (CAU-10- $H_{0.76}/(SO_3H)_{0.24}$ ),  $NO_2$ -MOF (CAU-10- $(NO_2)_{0.79}/(SO_3H)_{0.21}$ ), OH-MOF (CAU-10- $(OH)_{0.89}/(SO_3H)_{0.11}$ ) and single linker CAU-MOF. Prior to each measurement the samples were activated at 200 °C over night under vacuum ( $10^{-2}$  kPa). [Weiss et al. 2015, Reinsch et al. 2013]

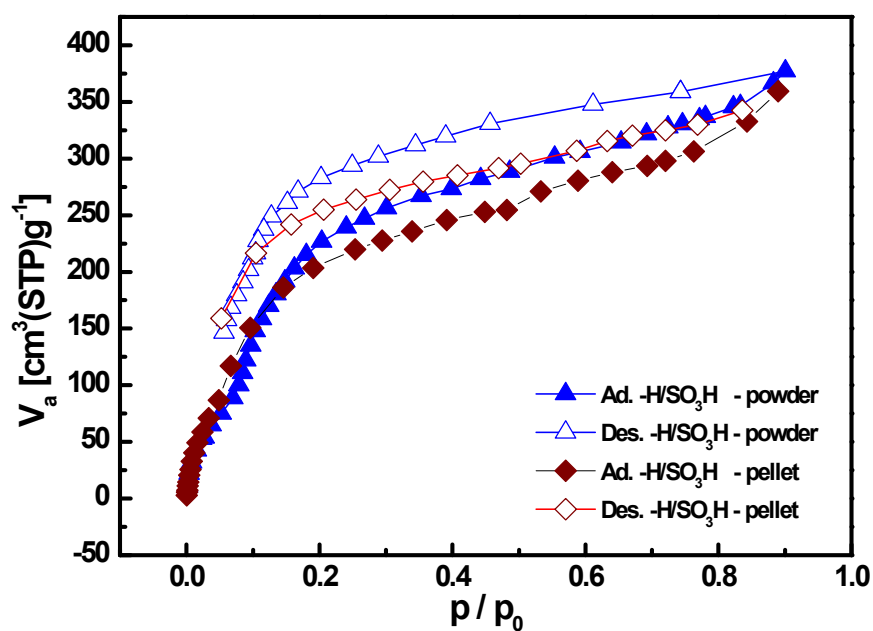

**Figure S2.** Water sorption isotherms at 298 K of the powder sample H-MOF ( $\text{CAU-10-H}_{0.76}/(\text{SO}_3\text{H})_{0.24}$ ) and after pellet pressing. Prior to each measurement the samples were activated at 200 °C over night under vacuum ( $10^{-2}$  kPa).

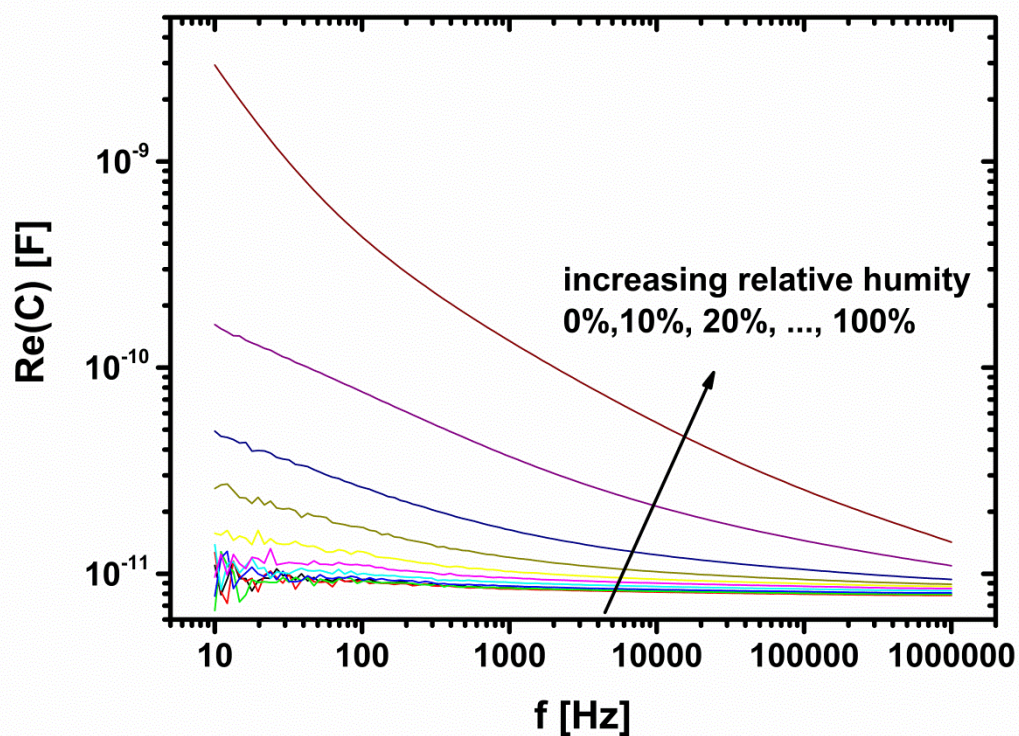

**Figure S3.** Screening using measurement setup (a) in the range from 10 Hz to  $10^6$  Hz. Exemplary plots of  $\text{Re}(C)$  over frequency for the H-MOF sample ( $\text{CAU-10-H}_{0.76}/(\text{SO}_3\text{H})_{0.24}$ ) at different relative

humidity levels. Calculated according the the following equation:  $Re(C) = \frac{-Im(Z)}{\omega(Re(Z)^2 + Im(Z)^2)}$  [Weiss et al. 2015].

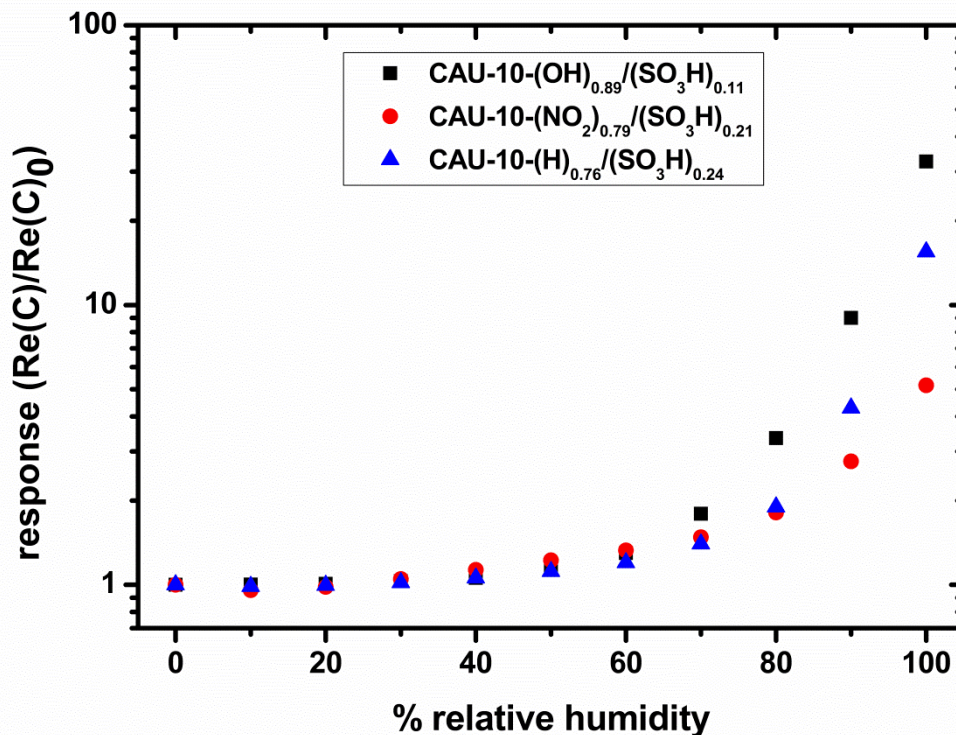

**Figure S4.** Response  $Re(C)/Re(C)_0$  of the samples H-MOF (CAU-10-H<sub>0.76</sub>/(SO<sub>3</sub>H)<sub>0.24</sub>), NO<sub>2</sub>-MOF (CAU-10-(NO<sub>2</sub>)<sub>0.79</sub>/(SO<sub>3</sub>H)<sub>0.21</sub>) and OH-MOF (CAU-10-(OH)<sub>0.89</sub>/(SO<sub>3</sub>H)<sub>0.11</sub>) when exposed to different humidity levels. Data points are calculated using the values at 1039 Hz from the frequency sweep. [Weiss et al. 2015]

Weiss et al. 2015

Weiss, A.; Reimer, N.; Stock, N.; Tiemann, M.; Wagner, T. Screening of Mixed-linker CAU-10 MOF Materials for humidity Sensing by Impedance Spectroscopy. *Microporous and Mesoporous Materials*, submitted 2015.

Reinsch et al. 2013

Reinsch, H.; van der Veen, M.; Gil, B.; Marszalek, B.; Verbiest, T.; de Vos, D.; Stock, N. Structures, Sorption Characteristics, and Nonlinear Optical Properties of a New Series of Highly Stable Aluminum MOFs. *Chem. Mater.*, 2013, 25 (1), pp 17–26; DOI: 10.1021/cm3025445
